# Supplementary material for: The Use of Single Drop Microextraction and Field Amplified Sample Injection for CZE Determination of Homocysteine Thiolactone in Urine
Source: MDPI journal article supplement (doi:10.3390/molecules26185687), 2021-09-20
Supplement: s1 [file s1]

## Supplementary materials

### 2 Results & discussion

#### 2.1. Capillary zone electrophoresis

Figures:

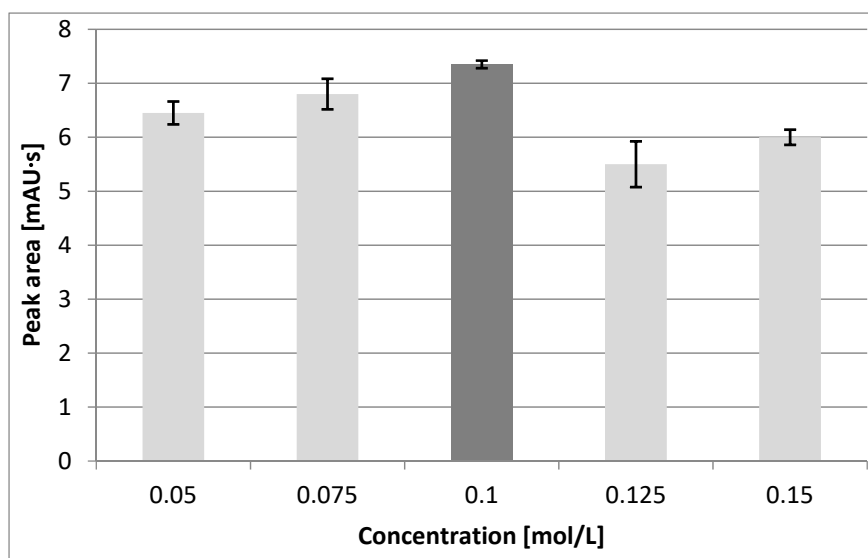

Figure S1. The influence of BGE concentration on HTL signal parameter.

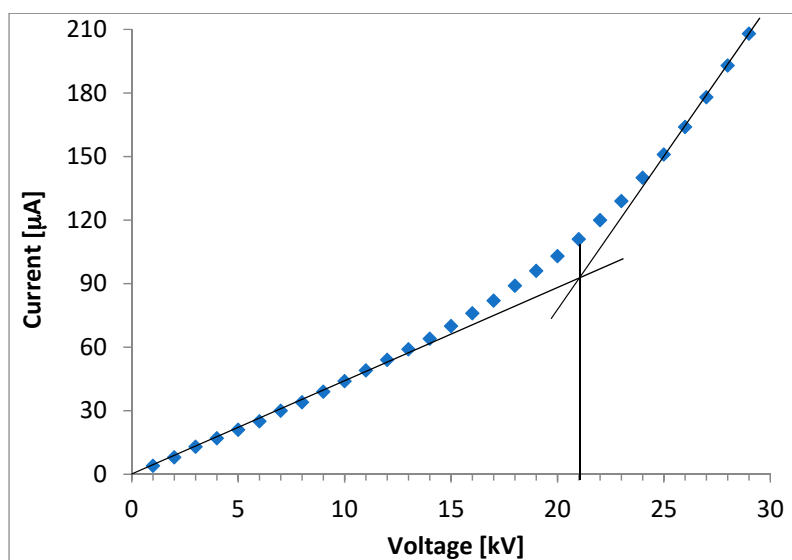

Figure S2. Relationship between applied current and applied high voltage.
